# Supplementary material for: Methylation and Expression of Immune and Inflammatory Genes in the Offspring of Bariatric Bypass Surgery Patients
Source: Hindawi journal article supplement (doi:10.1155/2013/492170), 2013-01-01
Supplement: f1 [file 492170.f1.pdf]

**Supplementary Table 1. Distribution of differentially methylated probes obtained from comparison between BMS and AMS offspring.**

|                                            | N      |
|--------------------------------------------|--------|
| Number of differentially methylated probes | 14 466 |
| <u>Localization*</u>                       |        |
| Gene body                                  | 5746   |
| 3'UTR                                      | 714    |
| 1 <sup>st</sup> exon                       | 273    |
| 5'UTR                                      | 1145   |
| Promoter region**                          | 2292   |
| TSS1500                                    | 1561   |
| TSS200                                     | 731    |
| Intergenic region                          | 4296   |

\* Localization relative to the 1st transcript annotated for each CpG site and provided for the Infinium HumanMethylation450 BeadChip.

\*\* Promoter region including TSS1500 (within 1500 bps of a TSS) and TSS200 (within 200 bps of a TSS).

Abbreviations: AMS, after maternal surgery; BMS, before maternal surgery; TSS, transcription start site; N, number

**Supplementary Table 2. List of differentially methylated genes from the IL-8 signaling pathway.**

| <b>Pathway</b> | <b>Genes</b>                                                                                                                                                                                                                                                                                                                                                                                                                                                                               |
|----------------|--------------------------------------------------------------------------------------------------------------------------------------------------------------------------------------------------------------------------------------------------------------------------------------------------------------------------------------------------------------------------------------------------------------------------------------------------------------------------------------------|
| IL-8 signaling | AKT1, ANGPT1, ANGPT2, AZU1, BCL2, CCND2, CCND3, CDH1, CXCR1, CXCR2, DEFA1, FLT1, GNA12, GNA13, GNAI1, GNAI2, GNAI3, GNAS, GNB1, GNB2L1, GNB5, GNG10, GNG12, GNG2, GNG4, GNG7, GPLD1, IKBKB, IKBKG, IL9, IRAK2, IRAK3, ITGAX, ITGB2, KDR, KRAS, LIMK2, MAP4K4, MAPK10, MAPK9, MPO, NCF2, NOX1, PAK2, PDGFC, PIK3C2B, PIK3C3, PIK3CA, PIK3CD, PIK3CG, PIK3R1, PIK3R5, PIK3R6, PLCB2, PLD1, PLD3, PRKCA, PRKCD, PRKCE, PRKCH, PRKCQ, PRKCZ, PRKD1, PRKD3, PTK2, RHOG, RHOH, ROCK1, SRC, VCAM1 |

**Supplementary Table 3. Significant partial correlations of gene methylation and expression with hsCRP levels following adjustment for the effects of age and sex.**

| Gene symbol | Methylation probe <sup>1</sup> | Localization | Transcript accession number | Gene methylation vs expression (N=46) |         | Gene methylation vs hsCRP level (N=50) |         | Gene expression vs hsCRP level (N=45) |         |
|-------------|--------------------------------|--------------|-----------------------------|---------------------------------------|---------|----------------------------------------|---------|---------------------------------------|---------|
|             |                                |              |                             | Pearson                               | p-value | Pearson                                | p-value | Pearson                               | p-value |
| BCL2        | cg08223235                     | Gene body    | NM_000633                   | 0.428                                 | 0.004   | -0.408                                 | 0.004   | -0.276                                | 0.07    |
| CCND2       | cg27317813                     | Gene body    | NM_001759                   | 0.536                                 | 0.0002  | -0.406                                 | 0.004   | -0.264                                | 0.09    |
| CXCR1       | cg13048967                     | 5'UTR        | NM_000634                   | -0.421                                | 0.004   | -0.291                                 | 0.05    | 0.172                                 | 0.27    |
| CXCR1       | cg15768138                     | 5'UTR        | NM_000634                   | -0.428                                | 0.004   | -0.315                                 | 0.03    | 0.172                                 | 0.27    |
| GNA12       | cg01139696                     | Gene body    | NM_007353                   | 0.338                                 | 0.02    | 0.219                                  | 0.13    | 0.203                                 | 0.19    |
| GNA12       | cg06544239                     | Gene body    | NM_007353                   | 0.414                                 | 0.005   | 0.141                                  | 0.34    | 0.203                                 | 0.19    |
| GNA12       | cg08377331                     | Gene body    | NM_007353                   | 0.339                                 | 0.02    | 0.076                                  | 0.61    | 0.203                                 | 0.19    |
| GNA12       | cg12444411                     | Gene body    | NM_007353                   | 0.304                                 | 0.04    | 0.060                                  | 0.69    | 0.203                                 | 0.19    |
| GNA12       | cg19524238                     | Gene body    | NM_007353                   | 0.340                                 | 0.02    | 0.123                                  | 0.41    | 0.203                                 | 0.19    |
| GNA13       | cg25554496                     | Gene body    | NM_006572                   | -0.382                                | 0.01    | 0.350                                  | 0.01    | -0.149                                | 0.34    |
| GNAI3       | cg19244300                     | Gene body    | NM_006496                   | 0.304                                 | 0.04    | -0.345                                 | 0.02    | -0.031                                | 0.84    |
| GNAS        | cg24617313                     | TSS1500      | NM_080425                   | 0.311                                 | 0.04    | 0.082                                  | 0.58    | -0.106                                | 0.50    |
| GNB2L1      | cg01919999                     | Gene body    | NM_006098                   | 0.461                                 | 0.002   | -0.225                                 | 0.12    | -0.060                                | 0.70    |
| GNG2        | cg27019717                     | 5'UTR        | NM_053064                   | 0.412                                 | 0.006   | -0.388                                 | 0.006   | -0.098                                | 0.53    |
| GNG7        | cg04603130                     | 5'UTR        | NM_052847                   | 0.369                                 | 0.01    | -0.418                                 | 0.003   | -0.169                                | 0.28    |
| GNG7        | cg24339704                     | 5'UTR        | NM_052847                   | 0.364                                 | 0.02    | -0.380                                 | 0.008   | -0.169                                | 0.28    |
| ITGAX       | cg04742550                     | TSS200       | NM_000887                   | -0.335                                | 0.03    | -0.130                                 | 0.38    | 0.101                                 | 0.52    |
| LIMK2       | cg07713946                     | 3'UTR        | NM_016733                   | 0.329                                 | 0.03    | 0.269                                  | 0.06    | 0.253                                 | 0.10    |
| MAP4K4      | cg13522882                     | Gene body    | NM_145687                   | -0.298                                | 0.05    | 0.335                                  | 0.02    | -0.073                                | 0.64    |
| NCF2        | cg09076123                     | 5'UTR        | NM_000433                   | -0.279                                | 0.07    | -0.355                                 | 0.01    | 0.276                                 | 0.07    |
| NCF2        | cg09472600                     | Gene body    | NM_000433                   | -0.368                                | 0.01    | -0.400                                 | 0.005   | 0.276                                 | 0.07    |
| PIK3C2B     | cg21195376                     | 5'UTR        | NM_002646                   | -0.284                                | 0.06    | 0.310                                  | 0.03    | -0.039                                | 0.81    |
| PIK3R1      | <u>cg00067720</u>              | TSS1500      | NM_181523                   | 0.466                                 | 0.001   | -0.446                                 | 0.002   | -0.309                                | 0.04    |
| PRKCA       | cg14648237                     | Gene body    | NM_002737                   | 0.433                                 | 0.003   | -0.368                                 | 0.01    | -0.233                                | 0.13    |
| PRKCA       | cg22435313                     | Gene body    | NM_002737                   | -0.368                                | 0.01    | 0.451                                  | 0.001   | -0.233                                | 0.13    |
| PRKCH       | cg14001486                     | Gene body    | NM_006255                   | -0.557                                | <0.0001 | 0.455                                  | 0.001   | -0.209                                | 0.18    |
| RHOH        | cg26163153                     | TSS1500      | NM_004310                   | -0.303                                | 0.05    | 0.331                                  | 0.02    | -0.120                                | 0.44    |

<sup>1</sup> Underlined: significantly correlate in all 3 analyses.
